# Supplementary material for: Akinetic rigid symptoms are associated with decline in a cortical motor network in Parkinson’s disease
Source: PubMed Central journal article supplement (PMC7445297; doi:10.1038/s41531-020-00120-3), 2020-08-24
Supplement: 41531_2020_120_MOESM1_ESM.pdf [file 41531_2020_120_MOESM1_ESM.pdf]

Supplementary Table 1.

| Image Analysis Types | Seed regions |
|----------------------|--------------|
| Resting State        | Anterior SPL |
| Resting State        | Motor Cortex |
| Resting State        | PCL          |
| VCM                  | n/a          |

Supplementary Table 1. *Summary of multiple regression analyses performed, imaging analysis types, and seed regions (for resting state). Abbreviations: Superior Parietal Lobule (SPL), Paracentral Lobule (PCL), Voxel Compression Maps (VCM).*
